# Supplementary material for: Structure of the dopamine D2 receptor in complex with the antipsychotic drug spiperone
Source: PubMed Central journal article supplement (PMC7755896; doi:10.1038/s41467-020-20221-0), 2020-12-22
Supplement: 41467_2020_20221_MOESM1_ESM.pdf [file 41467_2020_20221_MOESM1_ESM.pdf]

**Supplementary Information**

**Structure of the dopamine D<sub>2</sub> receptor in complex with the antipsychotic drug spiperone**

**D. Im *et al.***

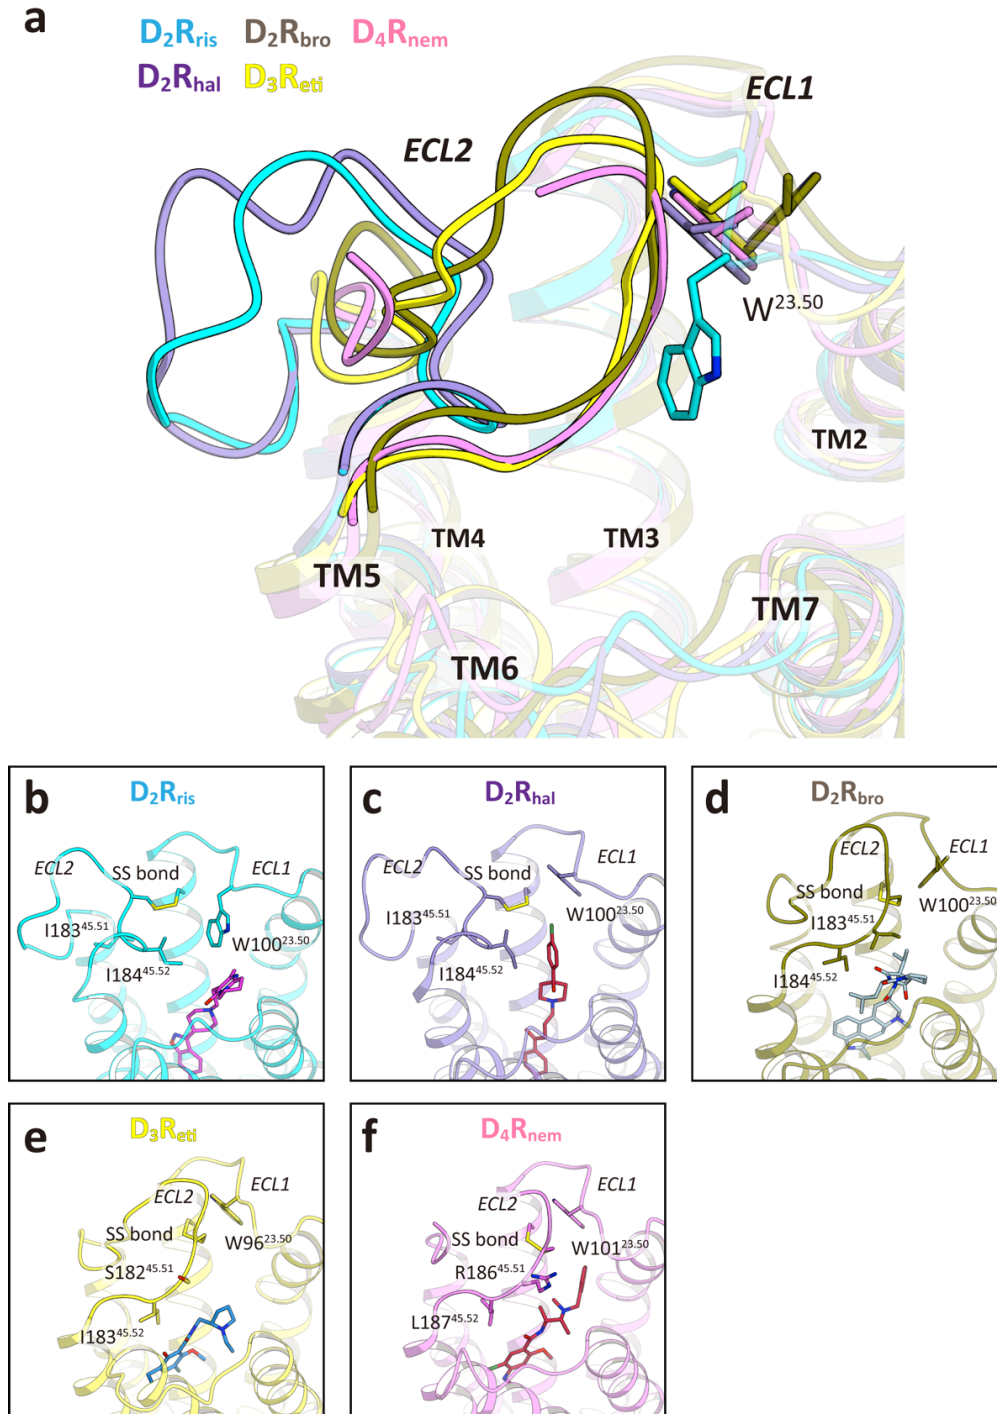

**Supplementary Fig. 1. Comparison of the ECL2 conformation of D<sub>2</sub>-class receptors. a,** Extracellular view of superposition of D<sub>2</sub>R<sub>ris</sub>, D<sub>2</sub>R<sub>hal</sub>, D<sub>2</sub>R<sub>bro</sub>, D<sub>3</sub>R<sub>eti</sub> and D<sub>4</sub>R<sub>nem</sub> around ECL2. The conformation of ECL2 of D<sub>2</sub>R<sub>ris</sub> (**b**), D<sub>2</sub>R<sub>hal</sub> (**c**), D<sub>2</sub>R<sub>bro</sub> (**d**), D<sub>3</sub>R<sub>eti</sub> (**e**) and D<sub>4</sub>R<sub>nem</sub> (**f**). D<sub>2</sub>R<sub>ris</sub> (cyan), D<sub>2</sub>R<sub>hal</sub> (purple), D<sub>2</sub>R<sub>bro</sub> (olive), D<sub>3</sub>R<sub>eti</sub> (yellow), D<sub>4</sub>R<sub>nem</sub> (pink), risperidone (magenta), haloperidol (ivory), bromocriptine (lightblue), eticlopride (blue), and nemonapride (red) are shown.

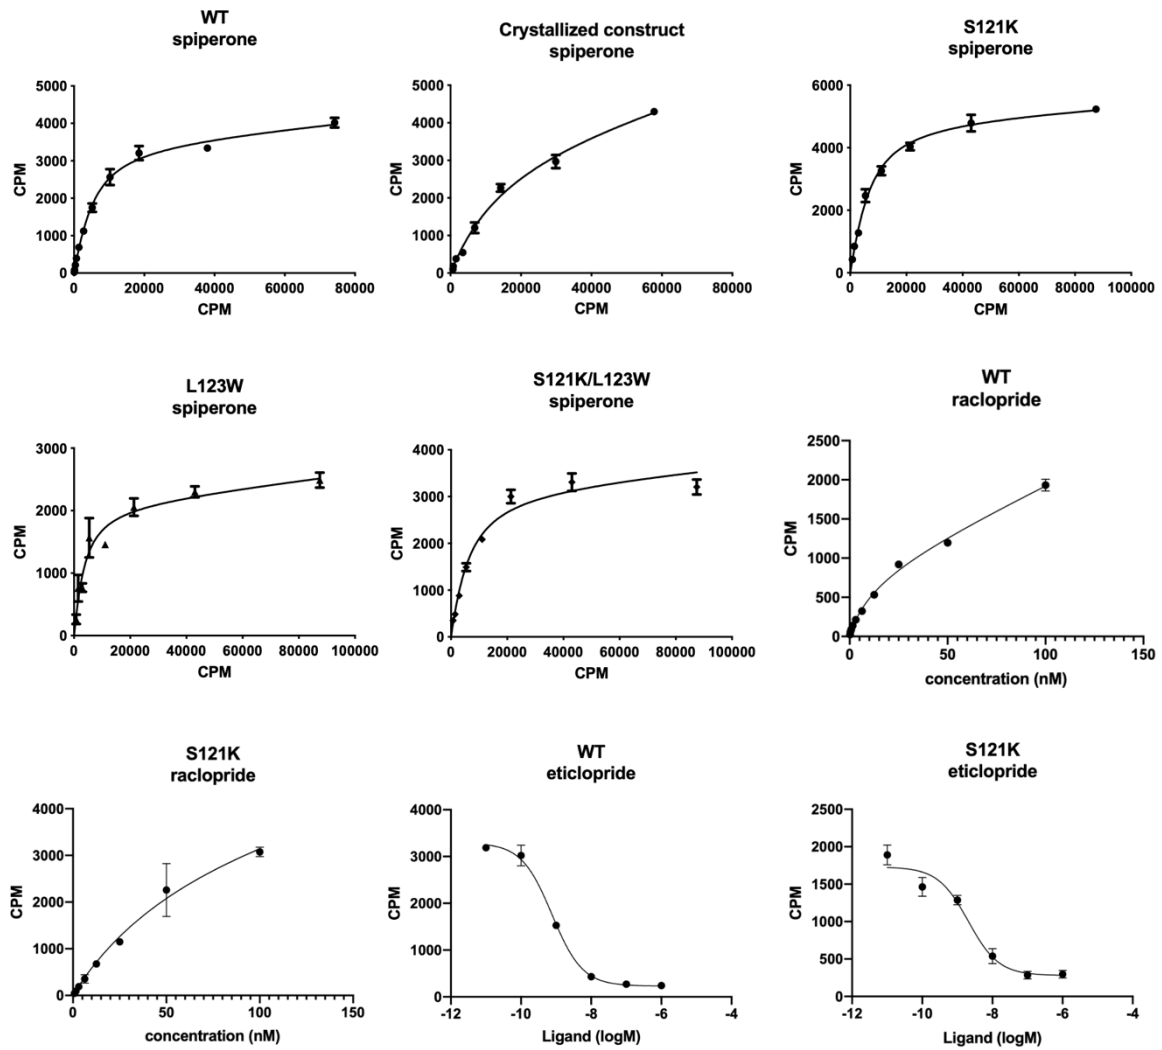

**Supplementary Fig. 2. The displacement curves of the wild type (WT) and the mutants D<sub>2</sub>Rs.** The detailed values are shown in Supplementary Table 2. Data represent mean  $\pm$  SEM from 3 biologically independent experiments.

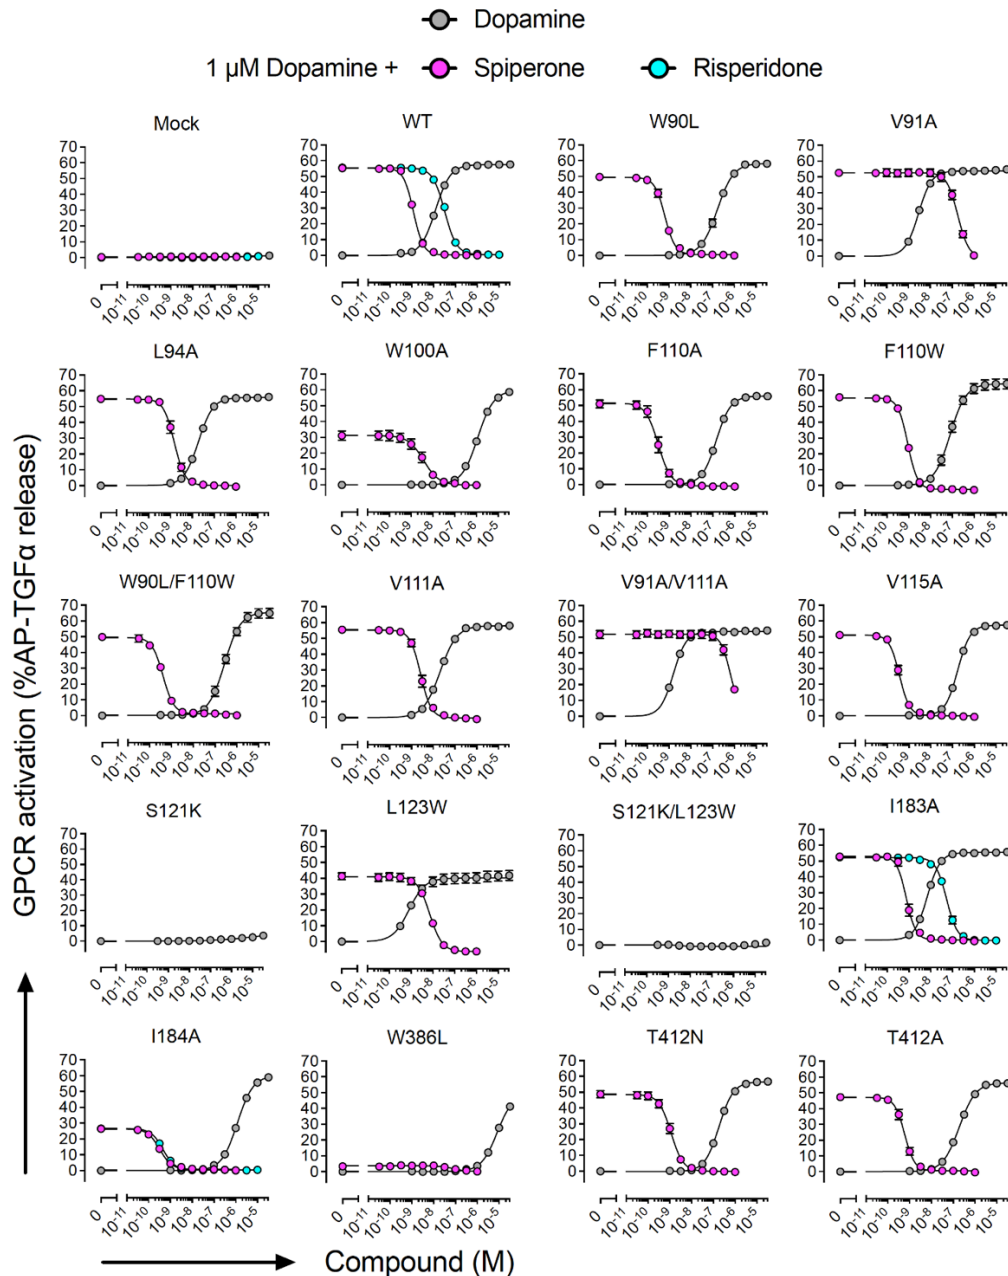

**Supplementary Fig. 3. TGF $\alpha$  shedding response.** HEK293 cells transfected with an empty vector (Mock), the wild type (WT) or the mutant D<sub>2</sub>R-encoding plasmids were subjected to the TGF $\alpha$  shedding assay for their agonist activity to dopamine (grey) or antagonist activity to spiperone (pink) or risperidone (blue) in the presence of 1  $\mu$ M dopamine. AP-TGF $\alpha$  release response in the absence of any of the compounds was set as a baseline. Data represent mean  $\pm$  SEM from biologically independent experiments. The numbers of the independent agonist experiments are 11 for WT, 10 for V111A, V115A and I184A, 9 for W90L, L94A, W100A, I183A, T412N and T412A, 8 for V91A, F110A, V91A/V111A and W386L, 5 for F110W, L123W and W90L/F110W, 3 for S121K and S121K/L123W. The numbers of the independent antagonist experiments are 11 for WT, 6 for V111A, V115A and I184A, 5 for W90L, L94A, W100A, I183A, T412N and T412A, 4 for V91A, F110A, F110W, L123W, W386L, W90L/F110W and V91A/V111A.

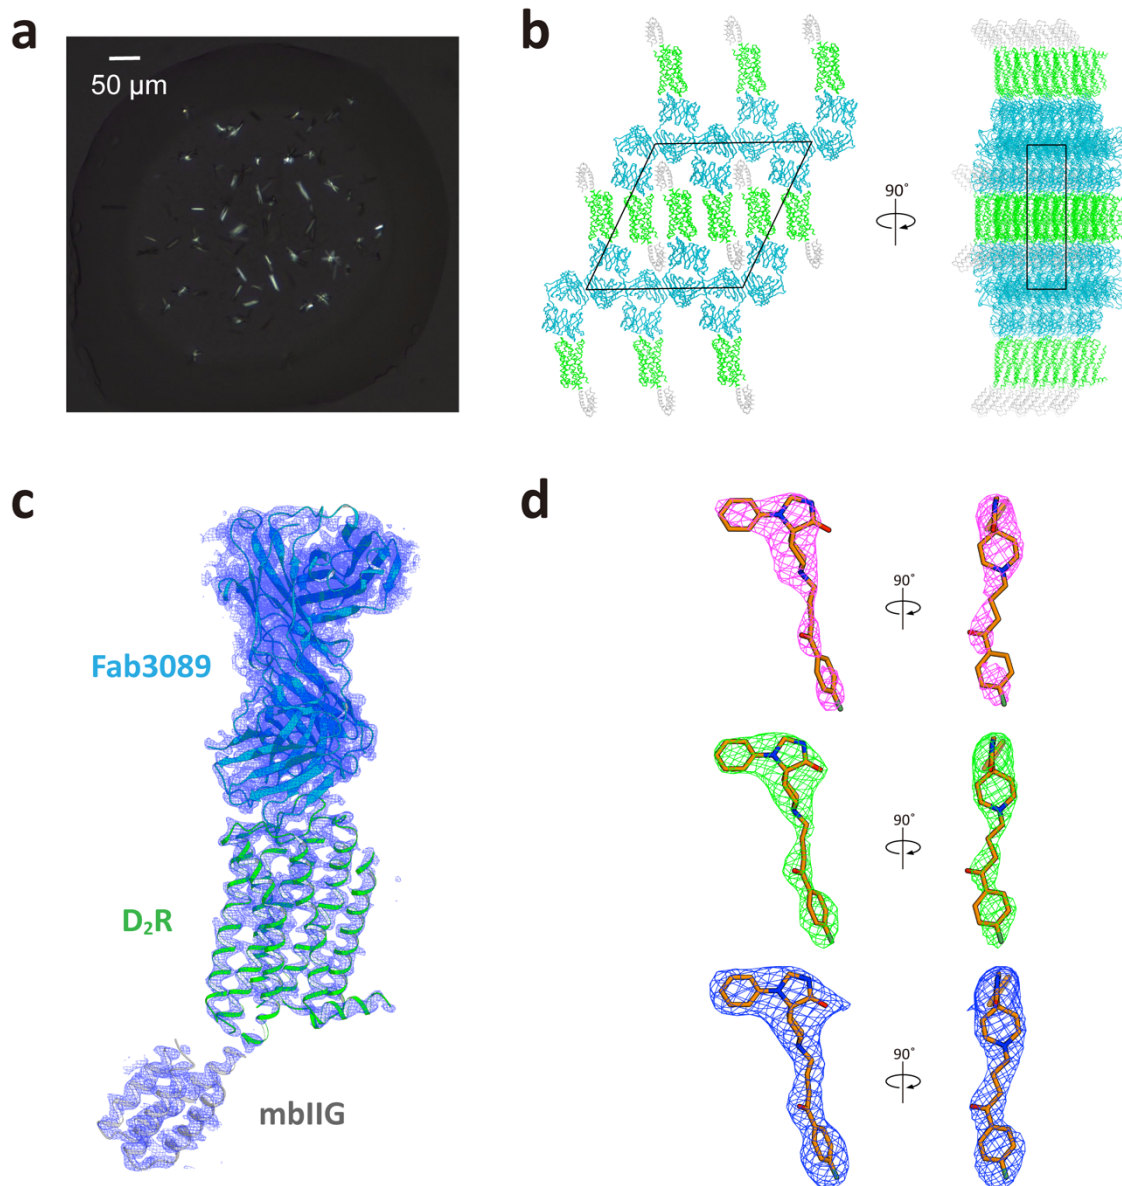

**Supplementary Fig. 4. Crystals, crystal packing and density maps of  $\text{D}_2\text{R}_{\text{spi}}$ .** **a**, Crystals of  $\text{D}_2\text{R}_{\text{spi}}$  under the cross-polarized light. This experiment was repeated independently 5 times with similar results. **b**, Crystal packing of  $\text{D}_2\text{R}_{\text{spi}}$ . The unit cell is outlined by the black line. **c**,  $2F_o-F_c$  electron density map for the  $\text{D}_2\text{R}_{\text{spi}}$ -Fab3089 complex contoured at  $1.0 \sigma$ . **d**, Simulated-annealing composite omit map (upper, in magenta),  $F_o-F_c$  map (middle, in green mesh) and polder map (lower, in blue mesh) of spiperone contoured at  $1 \sigma$ ,  $3 \sigma$  and  $4 \sigma$ , respectively.

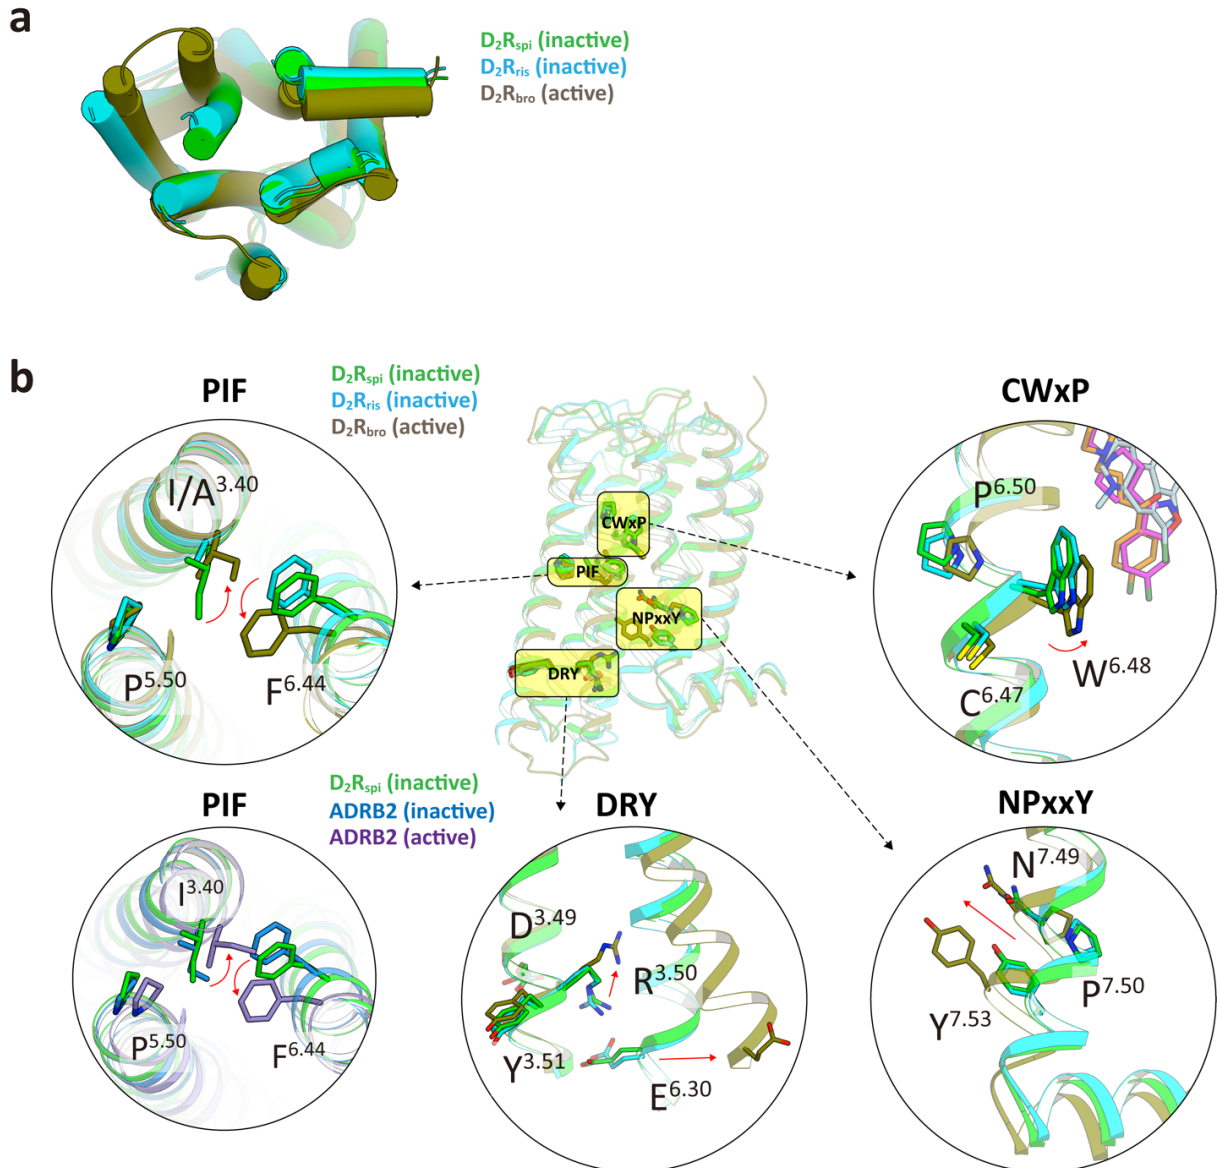

**Supplementary Fig. 5. Structural comparison of the seven transmembrane helices and the activation motifs in D<sub>2</sub>R and ADRB2.** **a**, Intracellular view of the superposition of D<sub>2</sub>R<sub>spi</sub>, D<sub>2</sub>R<sub>ris</sub> and D<sub>2</sub>R<sub>bro</sub>. Seven transmembrane helices and helix 8 are represented as cylinders. **b**, Superposition of D<sub>2</sub>R<sub>spi</sub>, D<sub>2</sub>R<sub>ris</sub>, D<sub>2</sub>R<sub>bro</sub> around the PIF motif, the CWxP motif, the DRY motif, and the NPxxY motif. The PIF motif of D<sub>2</sub>R<sub>spi</sub> is also compared with those of the inactive state ADRB2 (PDB ID: 5JQH), and the active state ADRB2 (PDB ID: 3SN6). Ligands and side chains are shown as sticks. Red arrows indicate the conformational rearrangements of residues in the activation motifs upon receptor activation. D<sub>2</sub>R<sub>spi</sub> (green), D<sub>2</sub>R<sub>ris</sub> (cyan), D<sub>2</sub>R<sub>bro</sub> (olive), inactive state ADRB2 (blue), active state ADRB2 (purple), spiperone (orange), risperidone (magenta), and bromocriptine (lightblue) are shown.



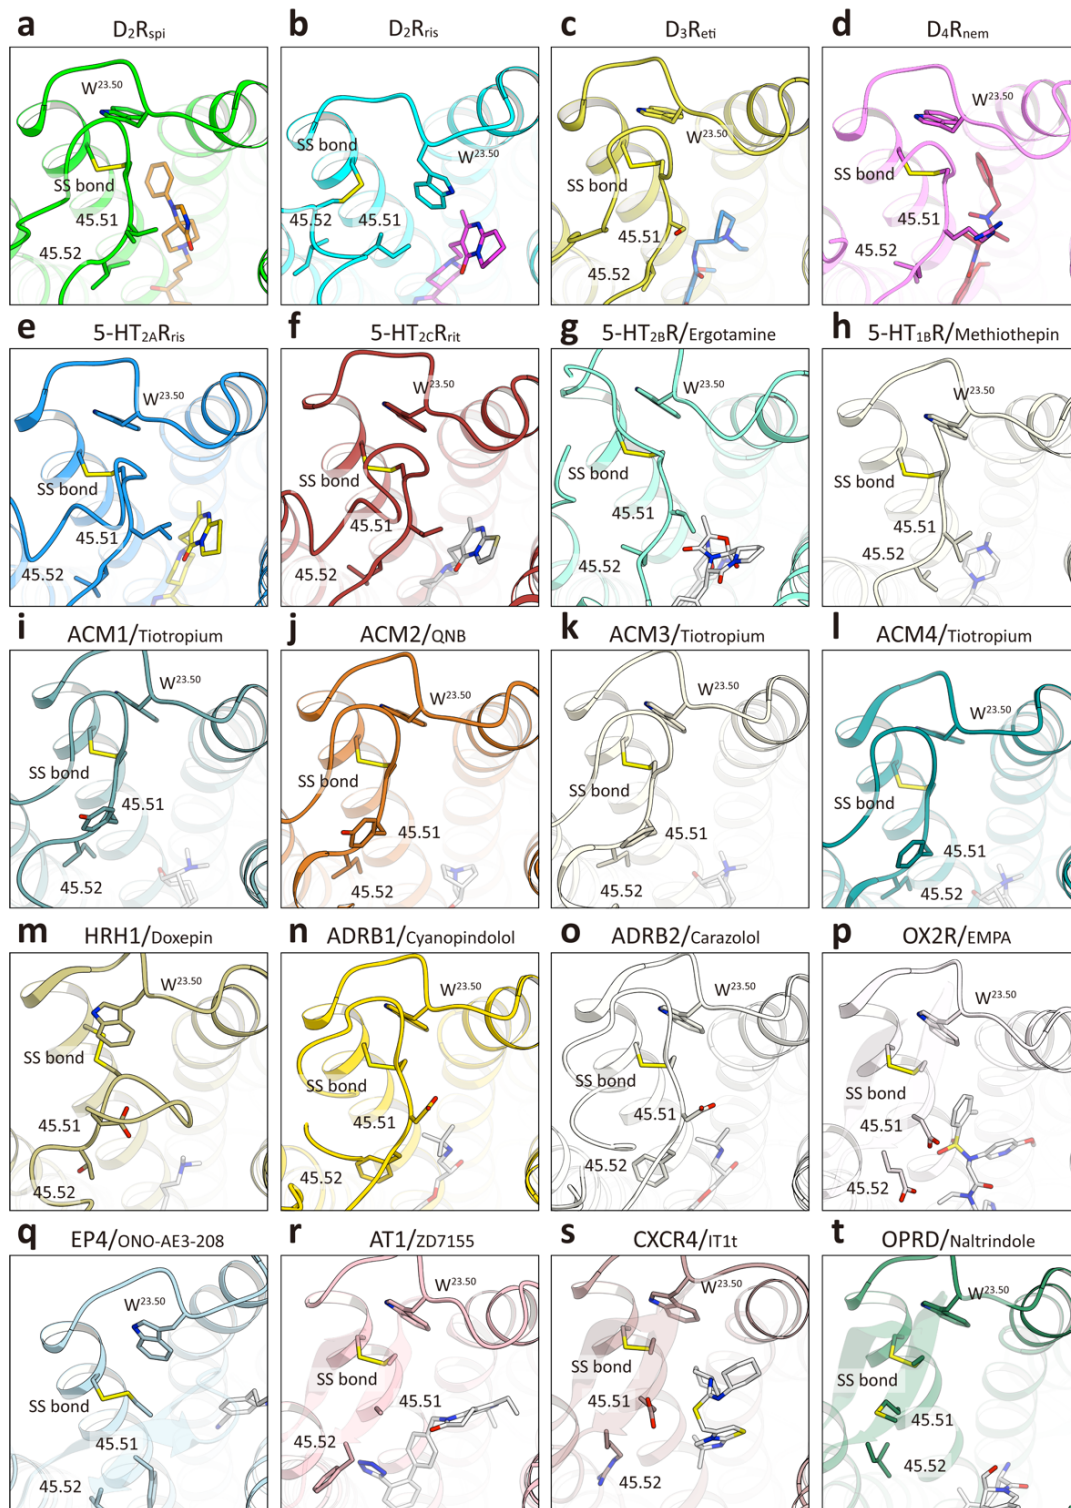

**Supplementary Fig. 6. The conserved conformation of Trp<sup>23.50</sup> on ECL1, the disulfide bridge, and residue<sup>45.51</sup> and residue<sup>45.52</sup> on ECL2. Ligands and side chains are shown as sticks. The PDB IDs are shown in parentheses. **a**, D<sub>2</sub>R<sub>spi</sub>. **b**, D<sub>2</sub>R<sub>ris</sub> (6CM4). **c**, D<sub>3</sub>R<sub>eti</sub> (3PBL). **d**, D<sub>4</sub>R<sub>nem</sub> (5WIU). **e**, 5-HT<sub>2A</sub>R<sub>ris</sub> (6A93). **f**, 5-HT<sub>2C</sub>R<sub>rit</sub> (6BQH). **g**, 5-HT<sub>2B</sub>R (4IB4). **h**, 5-HT<sub>1B</sub>R (5V54). **i**, ACM1 (5CXV). **j**, ACM2 (3UON). **k**, ACM3 (4DAJ). **l**, ACM4 (5DSG). **m**, HRH1 (3RZE). **n**, ADRB1 (2RH1). **o**, ADRB2 (2RH1). **p**, OX2R (5WS3). **q**, EP4 (5YWY). **r**, AT1R (4YAY). **s**, CXCR4 (3OE6). **t**, OPRD (4RWA).**

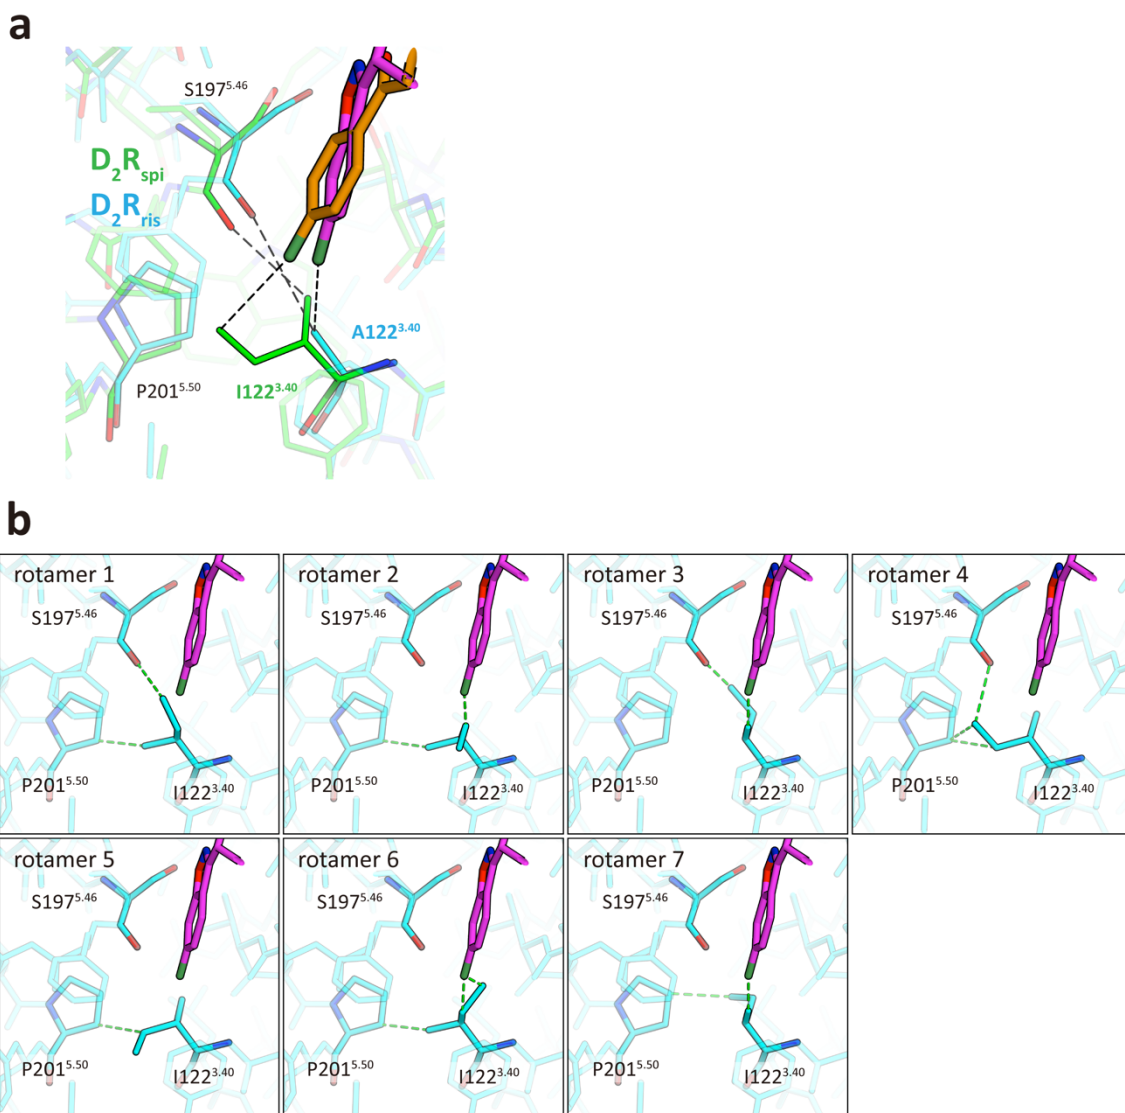

**Supplementary Fig. 7. Comparison of  $D_2R_{spi}$  with  $D_2R_{ris}$  around TM5 and the bottom hydrophobic cleft.** **a**, Close-up view of the superposition of  $D_2R_{spi}$  and  $D_2R_{ris}$  around I/A122<sup>3.40</sup>. Black dotted lines indicate the contact between I/A122<sup>3.40</sup> and the ligand or the carbonyl oxygen of S197<sup>5.46</sup>. **b**, The seven allowed side chain rotamers of the I122A<sup>3.40</sup> mutant of  $D_2R_{ris}$  generated using Coot. Green dotted lines indicate the steric contacts between I122<sup>3.40</sup> and risperidone or residues on TM5. Rotamer 4 represents the inactive conformation of the isoleucine of the PIF motif in the aminergic receptors, including  $D_2R_{spi}$ .  $D_2R_{spi}$ ,  $D_2R_{ris}$ , spiperone, and risperidone are indicated in green, cyan, orange, and magenta, respectively.



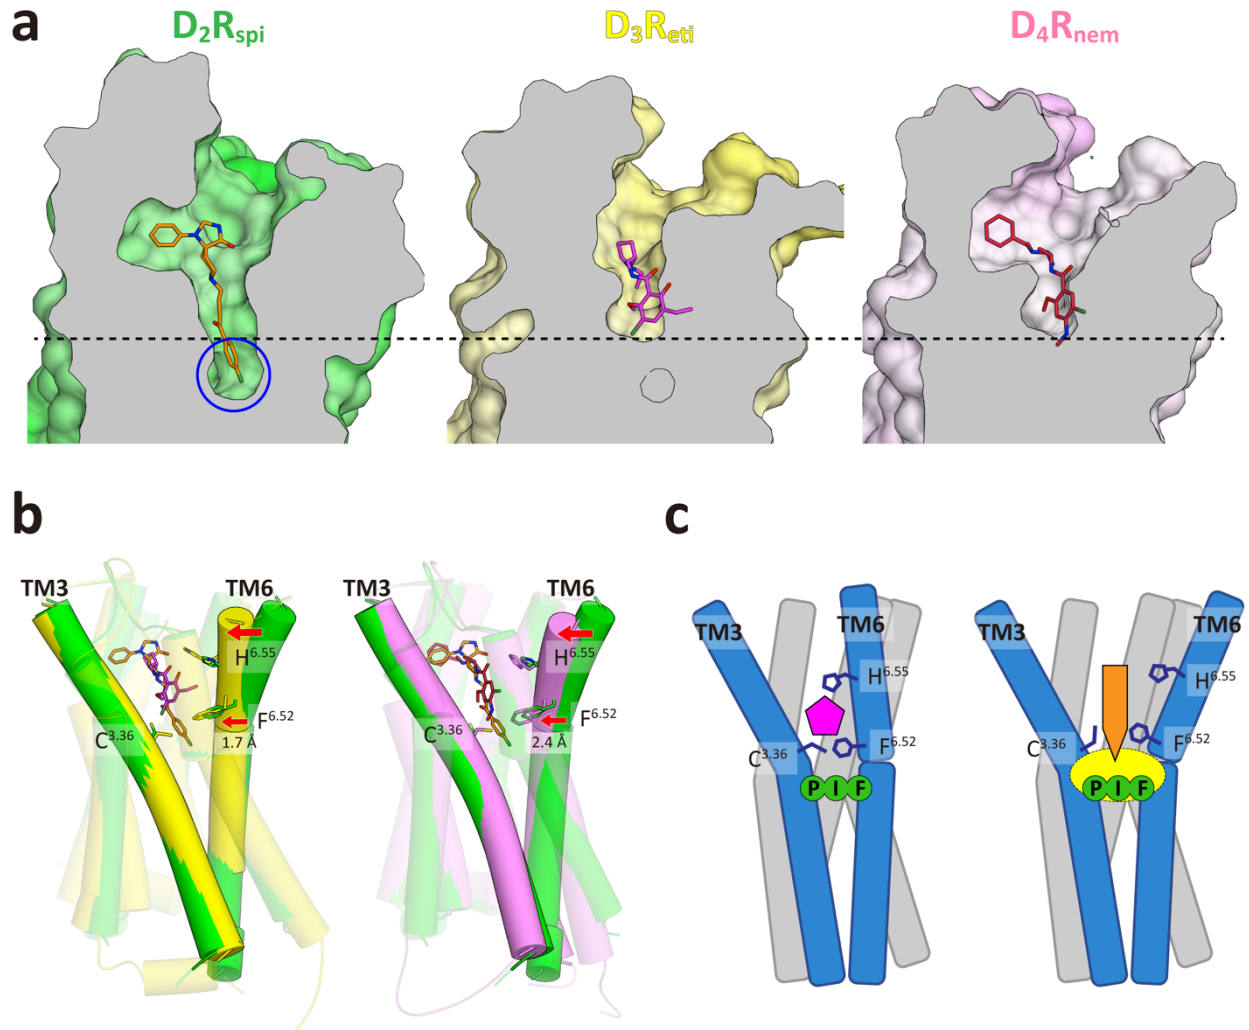

**Supplementary Fig. 8. Comparison of the ligand-binding pocket in D<sub>2</sub>-class receptors.** **a**, Vertical cross sections of D<sub>2</sub>-class receptors. Black dotted line indicates the positions of C<sup>3.36</sup> and F<sup>6.52</sup>. Blue circle indicates the bottom hydrophobic cleft. **b**, Superposition of the TMs of D<sub>2</sub>R<sub>spi</sub> and D<sub>3</sub>R<sub>eti</sub> (left) or D<sub>4</sub>R<sub>nem</sub> (right). Red arrows indicate the tilt of TM6 to TM3 in D<sub>3</sub>R<sub>eti</sub> and D<sub>4</sub>R<sub>nem</sub> in comparison with D<sub>2</sub>R<sub>spi</sub>. D<sub>2</sub>R<sub>spi</sub>, D<sub>3</sub>R<sub>eti</sub>, D<sub>4</sub>R<sub>nem</sub>, spiperone, eticlopride and nemonapride are shown in green, yellow, pink, orange, magenta and red, respectively. **c**, Schematic representation of two inactive states of D<sub>2</sub>-class receptors. Benzamide antipsychotics and butyrophenone or a pyridopyrimidine antipsychotics are shown pink and orange, respectively. The bottom hydrophobic cleft is indicated in yellow. The PIF motif is shown in green.

**Supplementary Table 1. RMSD values (Å) among the D<sub>2</sub>R structures.**

|                                 | D <sub>2</sub> R <sub>spi</sub> |                    |                  | D <sub>2</sub> R <sub>ris</sub> |       |     | D <sub>2</sub> R <sub>hal</sub> |       |     |
|---------------------------------|---------------------------------|--------------------|------------------|---------------------------------|-------|-----|---------------------------------|-------|-----|
|                                 | Overall                         | ΔECL2 <sup>1</sup> | 7TM <sup>2</sup> | Overall                         | ΔECL2 | 7TM | Overall                         | ΔECL2 | 7TM |
| D <sub>2</sub> R <sub>ris</sub> | 2.2                             | 1.0                | 0.8              |                                 |       |     |                                 |       |     |
| D <sub>2</sub> R <sub>hal</sub> | 2.1                             | 0.9                | 0.7              | 0.9                             | 0.7   | 0.5 |                                 |       |     |
| D <sub>2</sub> R <sub>bro</sub> | 2.5                             | 2.5                | 2.4              | 3.2                             | 2.6   | 2.5 | 3.1                             | 2.4   | 2.4 |

<sup>1</sup> Comparison without ECL2.

<sup>2</sup> Comparison of the transmembrane region.

**Supplementary Table 2. Affinities of antipsychotics for mutants and wild-type D<sub>2</sub>R.**

|                                              | Sipiperone<br>Kd ± SEM (nM) | Raclopride<br>Kd ± SEM (nM) | Eticlopride<br>Ki (nM)<br>(pKi ± SEM) |
|----------------------------------------------|-----------------------------|-----------------------------|---------------------------------------|
| Wild type                                    | 0.29 ± 0.05                 | 14.0 ± 6.2                  | 0.24<br>(9.62 ± 0.04)                 |
| Crystallized<br>construct <sup>1</sup>       | 1.1 ± 0.5                   |                             |                                       |
| S121K <sup>3,39</sup>                        | 0.34 ± 0.04                 | 75.6 ± 15.9                 | 1.5<br>(8.83 ± 0.13)                  |
| L123W <sup>3,41</sup>                        | 0.22 ± 0.06                 |                             |                                       |
| S121K <sup>3,39</sup> /L123W <sup>3,41</sup> | 0.40 ± 0.07                 |                             |                                       |
| I184A                                        | ND <sup>2</sup>             |                             |                                       |

<sup>1</sup> Expressed in Sf9 cells. Other receptors were expressed in HEK cells.

<sup>2</sup> ND: not determined because of the low expression.

**Supplementary Table 3. Antagonist activities of spiperone against the wild-type (WT) and mutant dopamine 2 receptors.**

|             | WT ( <i>n</i> = 16, 10) <sup>1</sup>      |                                  |                                    | W90L <sup>2,60</sup> ( <i>n</i> = 9, 5)                        |                     |                       |
|-------------|-------------------------------------------|----------------------------------|------------------------------------|----------------------------------------------------------------|---------------------|-----------------------|
|             | <i>E</i> <sub>max</sub> <sup>2</sup>      | pEC <sub>50</sub>                | EC <sub>50</sub> <sup>3</sup> (nM) | <i>E</i> <sub>max</sub>                                        | pEC <sub>50</sub>   | EC <sub>50</sub> (nM) |
| Dopamine    | 57.5 ± 1.6                                | 7.91 ± 0.02                      | 16                                 | 58.5 ± 1.5                                                     | 6.78 ± 0.06         | 170                   |
|             | pK <sub>B</sub>                           | K <sub>B</sub> <sup>3</sup> (pM) | ΔpK <sub>B</sub> <sup>4</sup>      | pK <sub>B</sub>                                                | K <sub>B</sub> (pM) | ΔpK <sub>B</sub>      |
| Spiperone   | 11.48 ± 0.11                              | 3.3                              | 0                                  | 10.17 ± 0.06                                                   | 68                  | -1.42 ± 0.14          |
| Risperidone | 9.95 ± 0.08                               | 110                              | 0                                  |                                                                |                     |                       |
|             | V91A <sup>2,61</sup> ( <i>n</i> = 8, 4)   |                                  |                                    | L94A <sup>2,64</sup> ( <i>n</i> = 9, 5)                        |                     |                       |
|             | <i>E</i> <sub>max</sub>                   | pEC <sub>50</sub>                | EC <sub>50</sub> (nM)              | <i>E</i> <sub>max</sub>                                        | pEC <sub>50</sub>   | EC <sub>50</sub> (nM) |
| Dopamine    | 53.8 ± 1.8                                | 8.54 ± 0.03                      | 2.9                                | 55.7 ± 1.1                                                     | 7.72 ± 0.03         | 19                    |
|             | pK <sub>B</sub>                           | K <sub>B</sub> (pM)              | ΔpK <sub>B</sub>                   | pK <sub>B</sub>                                                | K <sub>B</sub> (pM) | ΔpK <sub>B</sub>      |
| Spiperone   | 10.62 ± 0.25                              | 24                               | -0.94 ± 0.15                       | 11.27 ± 0.09                                                   | 5.4                 | -0.33 ± 0.11          |
|             | W100A <sup>23,50</sup> ( <i>n</i> = 9, 5) |                                  |                                    | F110A <sup>3,28</sup> ( <i>n</i> = 8, 4)                       |                     |                       |
|             | <i>E</i> <sub>max</sub>                   | pEC <sub>50</sub>                | EC <sub>50</sub> (nM)              | <i>E</i> <sub>max</sub>                                        | pEC <sub>50</sub>   | EC <sub>50</sub> (nM) |
| Dopamine    | 59.8 ± 1.3                                | 5.95 ± 0.04                      | 1100                               | 56.2 ± 1.4                                                     | 6.84 ± 0.03         | 150                   |
|             | pK <sub>B</sub>                           | K <sub>B</sub> (pM)              | ΔpK <sub>B</sub>                   | pK <sub>B</sub>                                                | K <sub>B</sub> (pM) | ΔpK <sub>B</sub>      |
| Spiperone   | 8.71 ± 0.06                               | 2000                             | -2.95 ± 0.12                       | 10.69 ± 0.09                                                   | 20                  | -0.87 ± 0.12          |
|             | F110W <sup>3,28</sup> ( <i>n</i> = 5, 4)  |                                  |                                    | W90L <sup>2,60</sup> /F110W <sup>3,28</sup> ( <i>n</i> = 5, 4) |                     |                       |
|             | <i>E</i> <sub>max</sub>                   | pEC <sub>50</sub>                | EC <sub>50</sub> (nM)              | <i>E</i> <sub>max</sub>                                        | pEC <sub>50</sub>   | EC <sub>50</sub> (nM) |
| Dopamine    | 64.2 ± 3.2                                | 7.11 ± 0.05                      | 77                                 | 65.3 ± 3.3                                                     | 6.56 ± 0.04         | 270                   |
|             | pK <sub>B</sub>                           | K <sub>B</sub> (pM)              | ΔpK <sub>B</sub>                   | pK <sub>B</sub>                                                | K <sub>B</sub> (pM) | ΔpK <sub>B</sub>      |
| Spiperone   | 10.45 ± 0.08                              | 36                               | -0.90 ± 0.13                       | 10.13 ± 0.04                                                   | 75                  | -1.22 ± 0.17          |
|             | V111A <sup>3,29</sup> ( <i>n</i> = 10, 6) |                                  |                                    | V91A <sup>2,61</sup> /V111A <sup>3,29</sup> ( <i>n</i> = 8, 4) |                     |                       |
|             | <i>E</i> <sub>max</sub>                   | pEC <sub>50</sub>                | EC <sub>50</sub> (nM)              | <i>E</i> <sub>max</sub>                                        | pEC <sub>50</sub>   | EC <sub>50</sub> (nM) |
| Dopamine    | 57.8 ± 1.0                                | 7.69 ± 0.04                      | 20                                 | 53.5 ± 1.6                                                     | 8.81 ± 0.03         | 1.6                   |
|             | pK <sub>B</sub>                           | K <sub>B</sub> (pM)              | pK <sub>B</sub>                    | pK <sub>B</sub>                                                | K <sub>B</sub> (pM) | ΔpK <sub>B</sub>      |
| Spiperone   | 10.72 ± 0.15                              | 19                               | -0.83 ± 0.12                       | 10.53 ± 0.17                                                   | 30                  | -1.03 ± 0.14          |
|             | V115A <sup>3,33</sup> ( <i>n</i> = 10, 6) |                                  |                                    | S121K <sup>3,39</sup> ( <i>n</i> = 3, ND)                      |                     |                       |
|             | <i>E</i> <sub>max</sub>                   | pEC <sub>50</sub>                | EC <sub>50</sub> (nM)              | <i>E</i> <sub>max</sub>                                        | pEC <sub>50</sub>   | EC <sub>50</sub> (nM) |
| Dopamine    | 57.2 ± 1.3                                | 6.77 ± 0.02                      | 170                                | NA <sup>5</sup>                                                | NA                  | NA                    |
|             | pK <sub>B</sub>                           | K <sub>B</sub> (pM)              | ΔpK <sub>B</sub>                   | pK <sub>B</sub>                                                | K <sub>B</sub> (pM) | ΔpK <sub>B</sub>      |
| Spiperone   | 10.62 ± 0.08                              | 24                               | -0.93 ± 0.18                       | ND <sup>6</sup>                                                | ND                  | ND                    |

|             | L123W <sup>3.41</sup> ( <i>n</i> = 10, 6) |                     |                       | S121K <sup>3.39</sup> /L123W <sup>3.41</sup> ( <i>n</i> = 3, ND) |                     |                       |
|-------------|-------------------------------------------|---------------------|-----------------------|------------------------------------------------------------------|---------------------|-----------------------|
|             | <i>E</i> <sub>max</sub>                   | pEC <sub>50</sub>   | EC <sub>50</sub> (nM) | <i>E</i> <sub>max</sub>                                          | pEC <sub>50</sub>   | EC <sub>50</sub> (nM) |
| Dopamine    | 40.4 ± 3.3                                | 9.09 ± 0.04         | 0.81                  | NA                                                               | NA                  | NA                    |
|             | pK <sub>B</sub>                           | K <sub>B</sub> (pM) | ΔpK <sub>B</sub>      | pK <sub>B</sub>                                                  | K <sub>B</sub> (pM) | ΔpK <sub>B</sub>      |
| Spiperone   | 11.71 ± 0.13                              | 1.9                 | 0.37 ± 0.16           | ND                                                               | ND                  | ND                    |
|             | I183A <sup>45.51</sup> ( <i>n</i> = 9, 5) |                     |                       | I184A <sup>45.52</sup> ( <i>n</i> = 10, 6)                       |                     |                       |
|             | <i>E</i> <sub>max</sub>                   | pEC <sub>50</sub>   | EC <sub>50</sub> (nM) | <i>E</i> <sub>max</sub>                                          | pEC <sub>50</sub>   | EC <sub>50</sub> (nM) |
| Dopamine    | 55.3 ± 1.0                                | 8.16 ± 0.03         | 6.9                   | 60.1 ± 1.0                                                       | 5.93 ± 0.03         | 1200                  |
|             | pK <sub>B</sub>                           | K <sub>B</sub> (pM) | ΔpK <sub>B</sub>      | pK <sub>B</sub>                                                  | K <sub>B</sub> (pM) | ΔpK <sub>B</sub>      |
| Spiperone   | 12.35 ± 0.11                              | 0.44                | 0.76 ± 0.11           | 9.73 ± 0.06                                                      | 190                 | -1.83 ± 0.20          |
| Risperidone | 10.52 ± 0.09                              | 30                  | 0.47 ± 0.11           | 9.60 ± 0.04                                                      | 250                 | -0.44 ± 0.15          |
|             | W386L <sup>6.48</sup> ( <i>n</i> = 8, 4)  |                     |                       | T412N <sup>7.39</sup> ( <i>n</i> = 9, 5)                         |                     |                       |
|             | <i>E</i> <sub>max</sub>                   | pEC <sub>50</sub>   | EC <sub>50</sub> (nM) | <i>E</i> <sub>max</sub>                                          | pEC <sub>50</sub>   | EC <sub>50</sub> (nM) |
| Dopamine    | 49.6 ± 2.1                                | 5.08 ± 0.03         | 8300                  | 56.4 ± 1.1                                                       | 6.73 ± 0.03         | 180                   |
|             | pK <sub>B</sub>                           | K <sub>B</sub> (pM) | ΔpK <sub>B</sub>      | pK <sub>B</sub>                                                  | K <sub>B</sub> (pM) | ΔpK <sub>B</sub>      |
| Spiperone   | NA                                        | NA                  | NA                    | 10.01 ± 0.05                                                     | 98                  | -1.59 ± 0.15          |
|             | T412A <sup>7.39</sup> ( <i>n</i> = 9, 5)  |                     |                       | /                                                                |                     |                       |
|             | <i>E</i> <sub>max</sub>                   | pEC <sub>50</sub>   | EC <sub>50</sub> (nM) |                                                                  |                     |                       |
| Dopamine    | 56.5 ± 1.5                                | 6.74 ± 0.04         | 180                   |                                                                  |                     |                       |
|             | pK <sub>B</sub>                           | K <sub>B</sub> (pM) | ΔpK <sub>B</sub>      |                                                                  |                     |                       |
| Spiperone   | 10.15 ± 0.10                              | 71                  | -1.45 ± 0.19          |                                                                  |                     |                       |

Data represent mean ± SEM of the indicated numbers of independent experiments.

<sup>1</sup> (*n* = 16, 10) indicates that the experiments were repeated 16 and 10 times to determine the pEC<sub>50</sub> and pK<sub>B</sub> values, respectively.

<sup>2</sup> *E*<sub>max</sub>: %AP-TGFα release.

<sup>3</sup> EC<sub>50</sub> and K<sub>B</sub> were calculated from the mean pEC<sub>50</sub> and pK<sub>B</sub> values, respectively.

<sup>4</sup> ΔpK<sub>B</sub> = pK<sub>B(mutant)</sub> - pK<sub>B(WT)</sub>, which was calculated for each experiment performed in parallel.

<sup>5</sup> NA: no detectable activity.

<sup>6</sup> ND: not determined because of lack of detectable dopamine response.



**Supplementary Table 4. Residues within 4.5 Å from spiperone in D<sub>2</sub>R<sub>spi</sub> and their equivalents in the related aminergic receptors.**

| D <sub>2</sub> R      | D <sub>3</sub> R | D <sub>4</sub> R | 5-HT <sub>2A</sub> R | 5-HT <sub>2C</sub> R |
|-----------------------|------------------|------------------|----------------------|----------------------|
| W90 <sup>2.60</sup>   | W85              | L90              | V130                 | L109                 |
| V91 <sup>2.61</sup>   | V86              | F91              | S131                 | S110                 |
| L94 <sup>2.64</sup>   | L89              | S94              | T134                 | A113                 |
| F110 <sup>3.28</sup>  | F106             | L111             | W151                 | W130                 |
| V111 <sup>3.29</sup>  | V107             | M112             | I152                 | I131                 |
| C182 <sup>45.50</sup> | C181             | C185             | C227                 | C207                 |
| I183 <sup>45.51</sup> | S182             | R186             | L228                 | V208                 |
| I184 <sup>45.52</sup> | I183             | L187             | L229                 | L209                 |
| D114 <sup>3.32</sup>  | D110             | D115             | D155                 | D134                 |
| T412 <sup>7.39</sup>  | T369             | T434             | V366                 | V354                 |
| Y416 <sup>7.43</sup>  | Y373             | Y438             | Y370                 | Y358                 |
| V115 <sup>3.33</sup>  | V111             | V116             | V156                 | V135                 |
| F389 <sup>6.51</sup>  | F345             | F410             | F339                 | F327                 |
| C118 <sup>3.36</sup>  | C114             | C119             | S159                 | S138                 |
| T119 <sup>3.37</sup>  | T115             | T120             | T160                 | T139                 |
| I122 <sup>3.40</sup>  | I118             | I123             | I163                 | I142                 |
| S197 <sup>5.46</sup>  | S196             | S200             | S242                 | A222                 |
| F198 <sup>5.47</sup>  | F197             | F201             | F243                 | F223                 |
| F382 <sup>6.44</sup>  | F338             | F403             | F332                 | F320                 |
| W386 <sup>6.48</sup>  | W342             | W407             | W336                 | W324                 |
| F390 <sup>6.52</sup>  | F346             | F411             | F340                 | F328                 |

**Supplementary Table 5. Primers for site-directed mutagenesis**

| Oligonucleotides primer      | Forward                                  | Reverse                                 |
|------------------------------|------------------------------------------|-----------------------------------------|
| D <sub>2</sub> R_W90L        | ATGCCCTGGTTGCTACCTGGAGGTG                | GACAACCAGGGCATGACCAGTGTGGC              |
| D <sub>2</sub> R_V91A        | CCCTGGGCCGTCTACCTGGAGGTGGTA              | GTAGACGGCCCAGGGCATGACCAGTGT             |
| D <sub>2</sub> R_L94A        | GTCTACGCCGAGGTGGTAGGTGAGTGG              | CACCTCGGCCGTAGACAACCCAGGGCAT            |
| D <sub>2</sub> R_W100A       | GGTGAGGCCAAAATTCAGCAGGATTCAC             | GAATTTGGCCTCACCTACCACCTCCAG             |
| D <sub>2</sub> R_F110A       | GACATCGCCGTCACCTCTGGACGTCATG             | AGTGACGGCGATGTCACAGTGAATCCT             |
| D <sub>2</sub> R_F110W       | GACATCTGGGTCACCTCTGGACGTCATGATGTGC       | AGTGACCCAGATGTCACAGTGAATCCTGCTGAA       |
| D <sub>2</sub> R_V111A       | ATCTTCGCCACTCTGGACGTCATGATG              | CAGAGTGGCGAAGATGTCACAGTGAAT             |
| D <sub>2</sub> R_V115A       | CTGGACGCCATGATGTGCACGGCGAGC              | CATCATGGCGTCCAGAGTGACGAAGAT             |
| D <sub>2</sub> R_S121K       | ACGGCGAAGATCCTGAACTTGTGTGCCATCAGC        | CAGGATCTTCGCCGTGCACATCATGACGTCCAG       |
| D <sub>2</sub> R_L123W       | AGCATCTGGAACCTTGTGTGCCATCAGCATCGAC       | CAAGTTCCAGATGCTCGCCGTGCACATCATGAC       |
| D <sub>2</sub> R_S121K/L123W | ACGGCGAAGATCTGGAACCTTGTGTGCCATCAGCATCGAC | CAAGTTCCAGATCTTCGCCGTGCACATCATGACGTCCAG |
| D <sub>2</sub> R_I183A       | GAGTGCGCCATTGCCAACCCGGCCTTC              | GGCAATGGCGCACTCGTTCTGGTCTGC             |
| D <sub>2</sub> R_I184A       | TGCATCGCCGCCAACCCGGCCTTCGTG              | GTTGGCGGCATGCACTCGTTCTGGTCTGC           |
| D <sub>2</sub> R_W386L       | ATCTGCCTGCTGCCCTTCTTCATCACA              | GGGCAGCAGGCAGATGATGAACACGCC             |
| D <sub>2</sub> R_T412N       | GCCTTCAACTGGCTGGGCTATGTCAAC              | CAGCCAGTTGAAGGCGTGTACAGGAC              |
| D <sub>2</sub> R_T412A       | GCCTTGCCTGGCTGGGCTATGTCAAC               | CAGCCAGGCGAAGGCGTGTACAGGAC              |
